# Supplementary material for: Growth of γ-Fe2O3 nanosheet arrays on graphene for electromagnetic absorption applications
Source: Royal Society of Chemistry journal article supplement (doi:10.1039/c4ra01082e), 2014-01-01
Supplement: c4ra01082e1.pdf [file c4ra01082e1.pdf]

## **Growth of $\gamma$ -Fe<sub>2</sub>O<sub>3</sub> nanosheet arrays on graphene for electromagnetic absorption applications**

**Yulan Ren,<sup>a</sup> Chunling Zhu,<sup>\*a</sup> Lihong Qi,<sup>b</sup> Hong Gao,<sup>c</sup> and Yujin Chen<sup>\*b</sup>**

<sup>a</sup> Key Laboratory Superlight Materials and surface technology, Ministry of Education , and  
College of Materials Science and Chemical Engineering, Harbin Engineering University, Harbin,  
Heilongjiang,

<sup>b</sup> College of Science, Harbin Engineering University, Harbin 150001, China

<sup>c</sup> Key Laboratory for Photonic and Electric Bandgap Materials, Ministry of Education, Harbin  
Normal University, Harbin, 150025, China

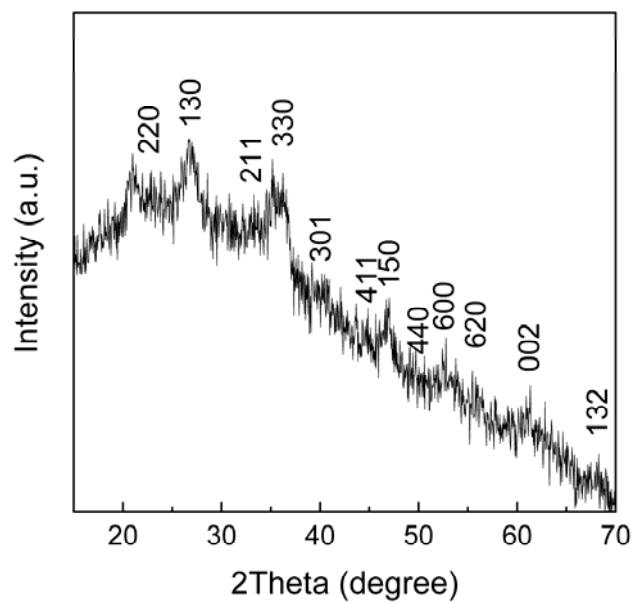

**Figure S1** XRD pattern of G/  $\beta$ -FeOOH nanosheet arrays

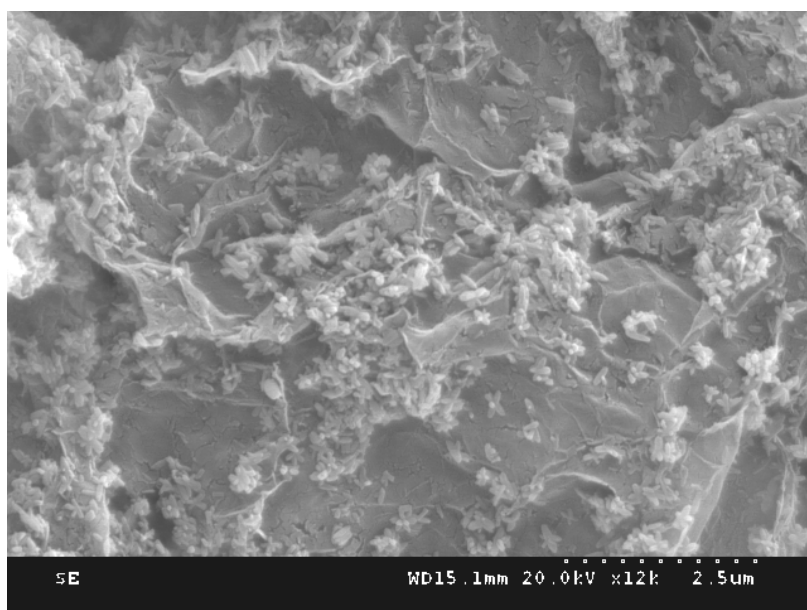

**Figure S2** SEM image of the sample obtained as the bare graphene sheets were added in the reaction system

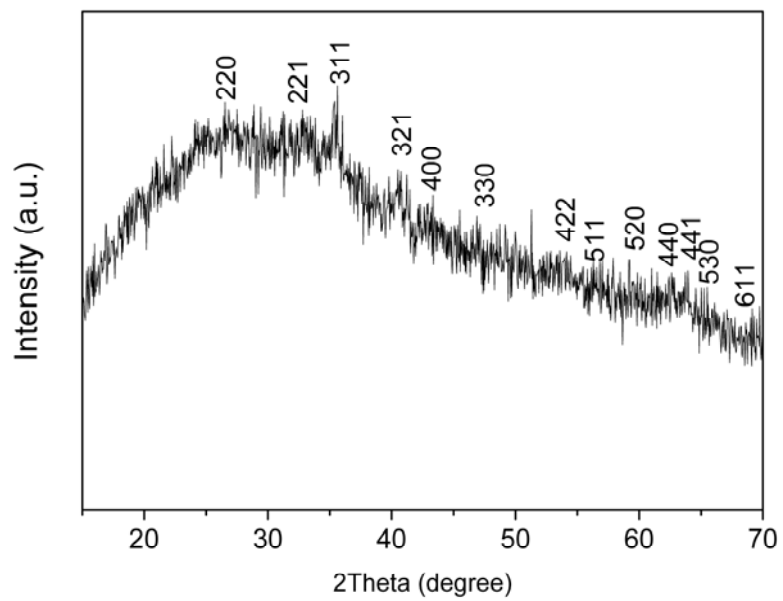

**Figure S3** XRD pattern of the 3D G/ $\gamma$ -Fe<sub>2</sub>O<sub>3</sub> nanosheet arrays

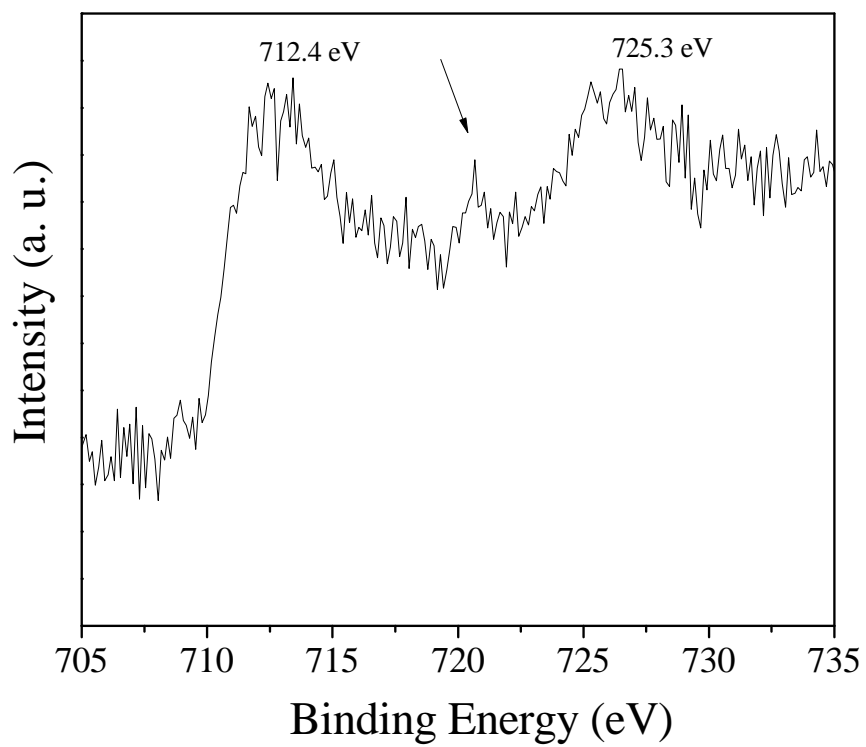

**Figure S4** Fe2p core level XPS spectrum of the 3D G/ $\gamma$ -Fe<sub>2</sub>O<sub>3</sub> nanosheet arrays

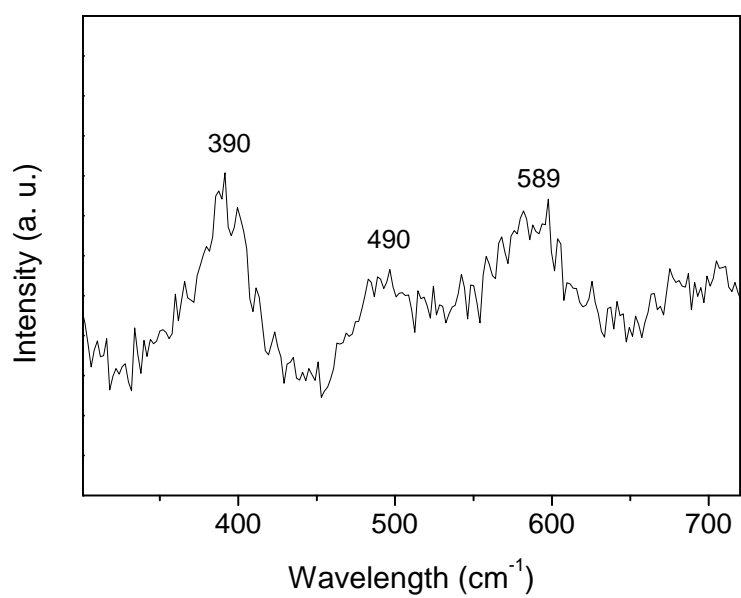

**Figure S5** Raman spectrum of the 3D G/ $\gamma$ -Fe<sub>2</sub>O<sub>3</sub> nanosheet arrays

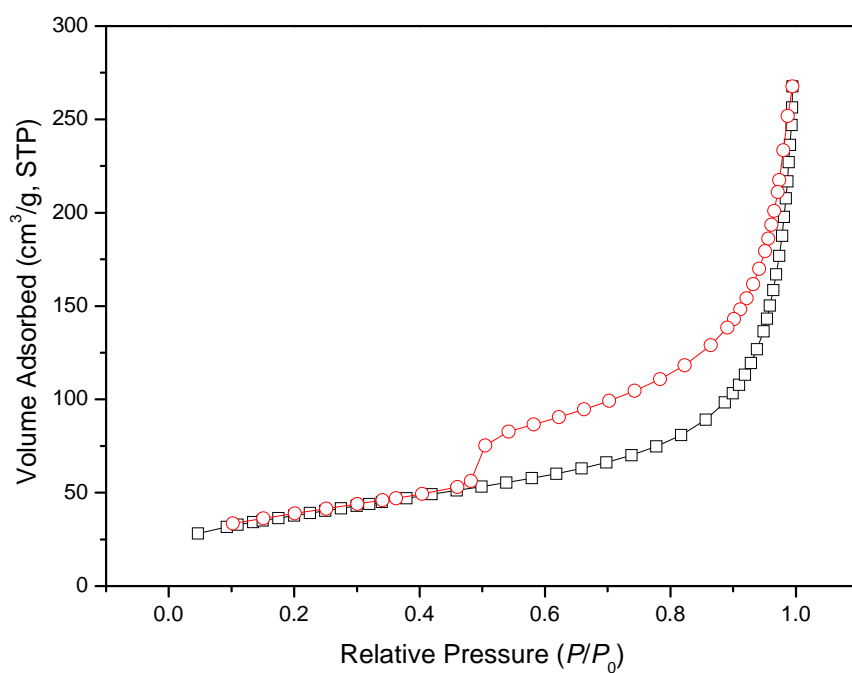

**Figure S6** Nitrogen adsorption and desorption isotherms of the 3D G/ $\gamma$ -Fe<sub>2</sub>O<sub>3</sub> nanosheet arrays

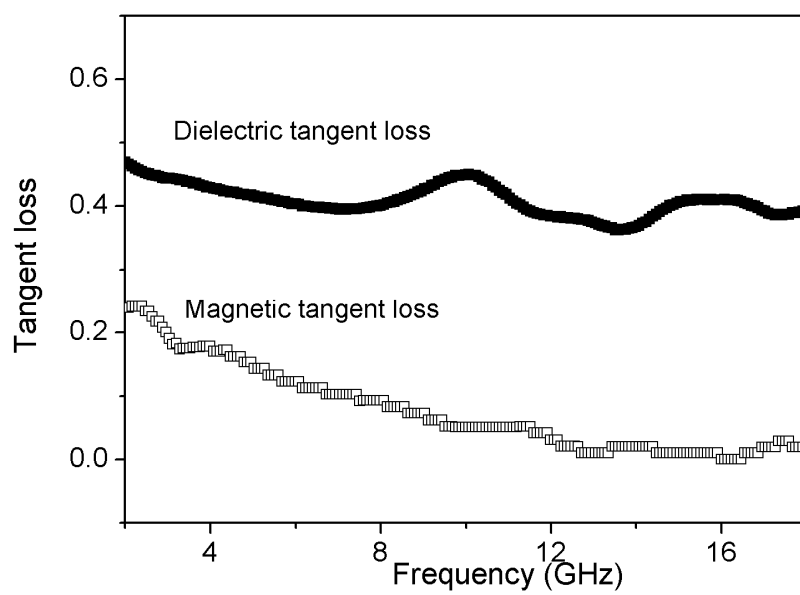

**Figure S7** Tangent losses of the 3D G/ $\gamma$ -Fe<sub>2</sub>O<sub>3</sub> nanosheet arrays
